# Supplementary figures and images for: Damage to the right insula disrupts the perception of affective touch
Source: eLife journal article supplement (doi:10.7554/elife.47895), 2020-01-24

# Imagined Tactile Pleasantness

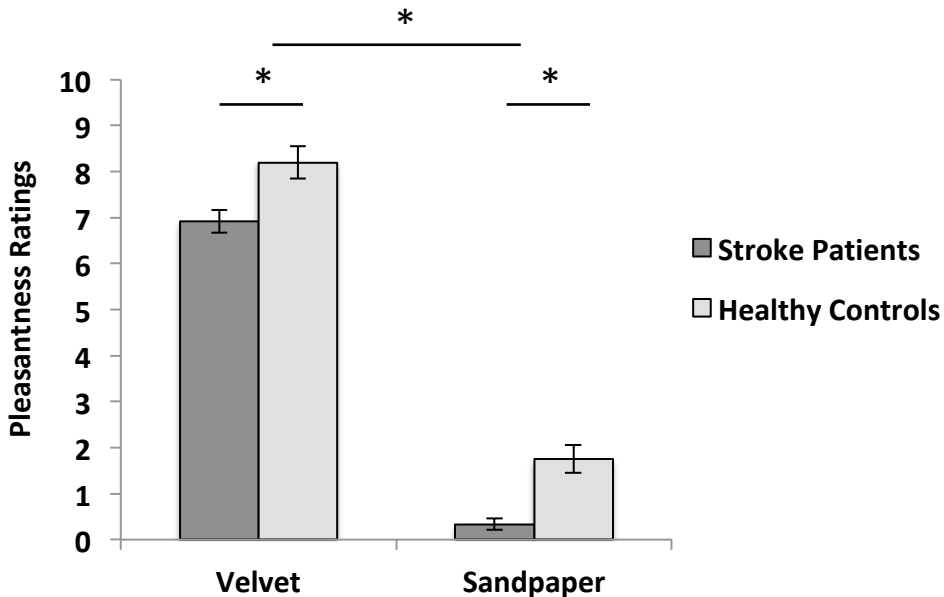

Supplement: supp [file elife-47895-supp-v1.zip]
